# Supplementary material for: Effective post-exposure prophylaxis of Covid-19 associated with hydroxychloroquine: Prospective dataset re-analysis incorporating novel, missing data
Source: bioRxiv or medRxiv preprint supplement (doi:10.1101/2020.11.29.20235218), 2021-07-05
Supplement: Supplementary file [file media-1.pdf]

## Supplemental Appendix

### Effective post-exposure prophylaxis of Covid-19 is associated with use of hydroxychloroquine: Prospective re-analysis of a public dataset incorporating novel data.

David M. Wiseman, PhD, MRPharmS; Pierre Kory, MD, MPA; Samir A Saidi, PhD, MB ChB; Dan Mazzucco, PhD.

#### TABLE OF CONTENTS

|                                                                                                                                                                |    |
|----------------------------------------------------------------------------------------------------------------------------------------------------------------|----|
| Authorship Contributions.....                                                                                                                                  | 1  |
| Abbreviations .....                                                                                                                                            | 1  |
| Supplemental Background.....                                                                                                                                   | 2  |
| Supplemental Methods .....                                                                                                                                     | 2  |
| Supplemental Results .....                                                                                                                                     | 3  |
| Supplemental References.....                                                                                                                                   | 20 |
| <br>                                                                                                                                                           |    |
| Table S 1: Demographic and clinical characteristics, stratified into Early and Late Cohorts .....                                                              | 6  |
| Table S 2: Clarification of Exposure Risk Definition .....                                                                                                     | 9  |
| Table S 3: Distribution of days for drug receipt days within strata for study enrollment.....                                                                  | 10 |
| Table S 4: Stratification of effect associated with hydroxychloroquine by gender based on time from exposure to drug receipt (ITT population).....             | 11 |
| Table S 5: Stratification of effect associated with hydroxychloroquine by exposure risk type based on time from exposure to drug receipt (ITT population)..... | 12 |
| Table S 6: Summary of subjects forming “Responding Population” .....                                                                                           | 13 |
| Table S 7: Effect of adherence to study drug on development of Covid-19 within Responding Population (RP).....                                                 | 14 |
| Table S 8: Effect associated with folate placebo in Responding Population .....                                                                                | 15 |
| Table S 9: Effect associated with folate placebo in Responding Population (fully and partially adherent study subjects), stratified by time and gender. ....   | 16 |
| Table S 10: Effect of ex-protocol use of Zinc or Vitamin C on effect associated with hydroxychloroquine stratified by time from exposure to drug receipt ..... | 17 |
| Table S 11: Effect of comorbidities on effect associated with HCQ .....                                                                                        | 18 |

#### Authorship Contributions

DMW conceived of the study with additional input from PK and DM. Statistical analysis was performed by DMW and DM. DMW wrote the first draft of the manuscript and is overall study guarantor, with contributions from PK and DM. SAS provided critical comments and contributed to analysis. All authors reviewed, revised, and approved the manuscript.

#### Abbreviations

|       |                                            |
|-------|--------------------------------------------|
| 95%CI | 95% Confidence Intervals                   |
| aHR   | adjusted Hazard Ratio                      |
| CDC   | Centers for Disease Control                |
| CQ    | Chloroquine (and its salts)                |
| EUA   | Emergency Use Authorization                |
| FDA   | United States Food and Drug Administration |
| HCQ   | Hydroxychloroquine (and its salts)         |
| HCW   | Health Care Worker                         |
| HR    | Hazard Ratio                               |
| IRB   | Institutional Review Board                 |
| ITT   | Intent to Treat                            |
| LTF   | Lost to Follow Up                          |
| NIH   | National Institutes of Health              |

|      |                               |
|------|-------------------------------|
| NNT  | Number Needed to Treat        |
| NO   | Nitric oxide                  |
| OR   | Odds Ratio                    |
| OSF  | Open Science Framework        |
| PCR  | Polymerase Chain Reaction     |
| PEP  | Post-Exposure Prophylaxis     |
| PET  | Post Exposure Treatment       |
| PPE  | Personal Protective Equipment |
| PrEP | Pre-exposure prophylaxis      |
| RCT  | Randomized Clinical Trial     |
| RP   | Responding Population         |
| RR   | Risk Ratio                    |
| SOC  | Standard of Care              |

## Supplemental Background

### *Folate, Zinc and Covid-19*

Possibly confounding the study is the use of folate for the placebo. *In silico*, folate may interact with SARS-Cov-2.<sup>1,2</sup> Blood folic acid levels were significantly lower in severe Covid-19 patients.<sup>3</sup> There may be an association between folate and severity or prevention of disease with other viruses.<sup>4-7</sup> Modulation of endothelial function may a fruitful approach in Covid-19 by improving pulmonary perfusion and reducing hypoxemia. High doses of folic acid (with Vitamin B6) improve NO mediated vasodilation in diabetic children<sup>8</sup> at doses of a similar order of magnitude (5mg) as those used in the PEP study (2.8mg initially, then 1.2mg daily, confirmed by Boulware et al., personal communication). Folate has been proposed to be a protective factor for Covid-19 in pregnant women.<sup>9</sup>

Conversely, there may be a negative effect of folate in Covid-19. The folate receptor on macrophages is upregulated in inflammation.<sup>10</sup> *In vitro* inhibition of viral replication by methotrexate<sup>11,12</sup> is synergistic with remdesivir and rescued by folinic acid.<sup>11</sup> Folate deficiency inhibits the proliferation of CD8+ T cells *in vitro*.<sup>13</sup> Methotrexate may be useful in Covid-19<sup>14</sup> (with folinic acid rescue<sup>15,16</sup>) possibly via effects on lymphocytes.<sup>17</sup>

Given the much-discussed effect of zinc as a treatment for viral infections in general and Covid-19 in particular,<sup>18,19</sup> and the action of CQ as a zinc ionophore,<sup>20</sup> we considered that the ex-protocol use of zinc supplements may have confounded the data. A similar case can be made for the ex-protocol use of Vitamin C.<sup>21-23</sup>

## Supplemental Methods

### *Protocol History*

Our protocol was registered on August 13, 2020 (v1.0, [osf.io/fgd53/](https://osf.io/fgd53/)) and revised August 19, 2020 (v1.1, [osf.io/9rpyt](https://osf.io/9rpyt)) before accessing the initial PEP dataset. We issued version v1.2 (September 27, 2020, [osf.io/vz8a7/24](https://osf.io/vz8a7/24)) prior to receiving additional data regarding the time to drug receipt in the 10/6 revision.

### *Clarifications to Dataset*

In reviewing the PEP study dataset, we verified variable tallies with the published account. A revision (9/9) resolving most discrepancies was provided. We performed similar checks on the 9/9, 10/6, and 10/30 revisions. Several of the original analyses were replicated to verify data importation and processing. A record of our questions and clarifications received was appended to our protocol registration ([osf.io/udx28/](https://osf.io/udx28/)).

There were four main areas requiring clarification (see Supplemental Methods) related to (i) tallies and definition of high- and moderate- risk exposure; (ii) tallies for subjects adhering to study medication; (iii) estimation of time from exposure to receipt of study medication; and (iv) nomenclature describing timing of study events.

Firstly, from the various combinations of reported use of different PPE items, we were unable to recreate the tallies for the number of subjects noted as having high or moderate risk exposures. We were informed that the published risk definitions had changed over time, and that an erratum would be submitted (Table S 2).

Secondly, we could not recreate the tallies for subjects adhering fully, partially or not at all to the study medication. The authors provided a variable (9/9 revision) from which, combined with other variables, we could recreate these tallies.

Thirdly, the published data had been stratified according to the days from the reported date of highest risk exposure to enrollment, rather than the time from exposure to first dose. Requesting further detail, additional data were provided (9/9 revision) describing the time from enrollment to receipt of study drug. These data did not account for time zone differences, delivery times for Canadian participants or biases introduced because of estimates of the time from exposure to enrollment. At our request, the authors provided (10/6 revision) the number of days from exposure to receipt of drug, likely self-correcting for time zone differences. This included data for the Canadian subjects.

Fourthly, the authors notified us of a third dataset (10/30) revision clarifying the previously used nomenclature describing the timing of study events. The word "Day" was clarified to represent the day on which enrollment (Days 1-4) or study drug receipt (Days 1-7) occurred, with the date of highest reported exposure being "Day 1." Accordingly, to calculate the elapsed time between exposure and enrollment or receipt of study drug, one day must be subtracted from the stated "Day." In the 10/30 revision, the definition for the variable describing the time from exposure to enrollment was partially clarified, but not that describing time from exposure to receipt of study drug. A derivative version of this variable was provided whose individual values were all smaller than for its primary version by one day.

Adopting this clarification, we note its inconsistency with some statements made in the original paper that indicated the occurrence of some study events to be one day later. This clarification does not alter the relative time stratification we present here.

#### *Provision of outcome data, adherence to study drug, use of folate and comorbidities*

We also analyzed the data according to adherence to taking study medication, whether subjects provided outcome data and the use of the folate placebo. We constructed a "Responding Population" (RP) by excluding those subjects who were lost to follow up (LTF) or withdrew consent and who provided no outcome data (Table S 6).

To examine the effect of folate and adherence to study drug, we constructed three treatment arms. In addition to the HCQ treatment arm (fully and partially adherent) we constructed a "folate only" control arm (fully or partially adherent) and a "no folate" control arm consisting of the Canadian subjects randomized to lactose placebo pooled with subjects identified as taking neither HCQ or placebo. Within the ITT population, we examined the effect of co-morbidities on any possible effect of HCQ. Due to the low incidence of most of the co-existing conditions, we examined only the three most frequent conditions (asthma, diabetes, hypertension), in addition to subjects reporting no co-existing conditions or conditions not otherwise listed in the screening questionnaire.

#### *Confirmation of findings by Luco*

We performed several analyses to replicate the findings of Luco<sup>25</sup> who conducted his own re-analysis of the same PEP dataset, related to the effect of age, exposure risk and co-morbidities. These analyses also serve as a verification of our calculations as appropriate.

### **Supplemental Results**

#### *Verification of primary time stratification*

As a further quality control check we verified the performance of our primary stratification by time by comparing spreadsheet output with two calculations provided by the original authors. These calculations used the new data we had requested describing the time between exposure and receipt of study drug provided in the 10/6 revision.

Both calculations referred to subjects receiving study drug on Day 3 or earlier, with Day 1 = day of exposure.

The first calculation provided was: "By ITT analysis for those  $\leq 3$  days from exposure to med delivery, the actual Odds Ratio = 0.53 (95%CI, 0.23 to 1.22,  $P=0.14$ )." We replicated this calculation with OR=0.5310 (95%CI 0.2302-1.2246;  $p=0.149$ ).

The second calculation provided was: "By modified intent-to-treat (limiting to those who took a dose of the study drug within  $\leq 3$  days of exposure), Odds Ratio = 0.57 (95%CI, 0.24 to 1.34,  $P=0.20$ )." We again replicated this calculation (OR 0.5704, 95%CI 0.2433-1.3375;  $p=0.2073$ ).

### *Effect of exposure risk on outcomes*

There were differences in the response associated with HCQ noted according to the level of risk exposure (Table S 5). A statistically significant effect associated with Early HCQ prophylaxis was observed in subjects experiencing high (RR 0.48, 95%CI 0.28-0.85,  $p=0.013$ , NNT 10.9) but not moderate (RR 1.73, 95%CI 0.48-6.23) risk exposures. The population size for the moderate risk level was small, especially for the Late prophylaxis cohort.

We verified the findings of Luco<sup>25</sup> who found reductions in Covid-19 associated with HCQ when all patients (not stratified by time) below 50 years were considered (RR 0.71; 95%CI 0.48-1.05,  $p=0.089$ ), with a significant reduction associated with HCQ in the cohort younger than 50 years experiencing a high-risk exposure (RR 0.63; 95%CI 0.41-0.95,  $p=0.293$ ).

### *Severity of symptoms reported on day 14 from drug receipt*

We did not detect differences in the severity (median, IQR, n) of symptoms associated with HCQ use reported on day 14 from drug receipt for both Early (HCQ 3.13; 1.95-4.58,  $n=10$  vs. placebo 3.0; 1.9-4.1,  $n=21$ ) and Late prophylaxis (HCQ 2.5; 1.65-4.1,  $n=23$  vs. placebo 2.4; 1.4-5.1,  $n=13$ ). This result is limited by the small number of subjects ( $n=67$ ) reporting symptom scores.

### *Provision of outcome data, adherence to study drug and use of folate*

Considering only the “Responding Population” (Table S 6), the effect associated with HCQ on the development of Covid-19 was similar to that seen in the whole population (Table S 7). Any small effect associated with HCQ observed (RR 0.82) was attenuated when only those subjects who were fully (RR 0.93) and fully or partially (RR 0.89) adherent to study medication were considered (Table S 7).

We examined how using the folate placebo might influence outcomes. The “no folate control” cohort had a slightly reduced (RR 0.93) development of Covid-19 compared with the “folate only placebo” cohort (Table S 8), resulting in a small change in the estimation of the effect associated with HCQ in the overall Responding Population. Stratifying these data by time reveals no discernible effect of the folate placebo (Table S 9). Combining the “folate only placebo” and “no folate control” cohorts, there was a directionally similar effect associated with HCQ (full plus partial adherence) to that observed in the ITT population for the Early prophylaxis cohort (RR 0.65, 95%CI 0.39-1.08;  $p=0.11$ ).

### *Ex-protocol use of zinc and Vitamin C*

The doses, duration of use, or reasons for self-medication with zinc or Vitamin C are unknown. The number of subjects was small in most of the sub-groups representing the different combinations of use of both agents, the largest of which ( $n=504$ ) reported taking neither agent. Time stratified data for these subjects reveal an effect similar to that found in the ITT population, but without achieving statistical significance (Table S 10).

### *Influence of co-morbidity on HCQ-associated outcomes*

Small population sizes (Table S 11) within the subgroups representing the three most frequent co-morbidities (hypertension, asthma, diabetes) prompt cautious analysis. However, for subjects reporting no co-existing conditions (72.6% of population) there was a reduction signal in Covid-19 associated with HCQ in the whole cohort (RR 0.7, 95%CI 0.46-1.06,  $p=0.094$ ). Confirming the analysis by Luco,<sup>25</sup> when asthma and “other” co-morbidities are excluded, there was similar signal (RR 0.72, 95%CI 0.49-1.05,  $p=0.097$ ). Removing only asthma subjects yields a slightly weaker signal (RR 0.77, 95%CI 0.53-1.11,  $p=0.198$ ). It must be noted that the incidence of Covid-19 observed for the asthma and the “other” co-morbidity sub-groups (6.5%) was much lower than that for the other groups (10.4-15.9%).

Stratifying by time and with no effects associated with Late HCQ prophylaxis, these trends achieved statistical significance associated with Early HCQ prophylaxis with no co-morbidity (RR 0.49, 95%CI 0.27-0.88,  $p=0.015$ , NNT 10.2), excluding asthma and “other” co-morbidity (RR 0.52, 95%CI 0.3-0.9,  $p=0.023$ ) or excluding just subjects with asthma (RR 0.54, 95%CI 0.32-0.92,  $p=0.026$ ).

Stratifying by age and considering only subjects with no co-morbidities, reveals a stronger response associated with Early HCQ prophylaxis for the younger (18-45) (RR 0.44, 95%CI 0.23-0.85,  $p=0.016$ ) age group. Although a stronger

signal was observed in older subjects (>45 years) (RR 0.7, 95%CI 0.21-2.3, p= 0.739) that had not been seen in other age-related stratifications, this did not reach statistical significance.

Table S 1: Demographic and clinical characteristics, stratified into Early and Late Cohorts

The data for the original cohort recreates data from the original paper, for comparison and quality control purposes. Several variables have been added. The data are stratified into the Early (1-3 days) and Late (4-6 days) post exposure prophylaxis cohorts.

(I/S/%) - Shown in parentheses are interquartile ranges (1<sup>st</sup> and 3<sup>rd</sup> quartile), or standard deviations where indicated. All other parentheses indicate the percent contribution to the cohort total.

| Characteristic                        | Original Cohort |         |         |         | Early (<= 3 days from exposure) |         |         |         | Late Cohort (4-6 days from exposure) |         |         |         |
|---------------------------------------|-----------------|---------|---------|---------|---------------------------------|---------|---------|---------|--------------------------------------|---------|---------|---------|
|                                       | HCQ             |         | Placebo |         | HCQ                             |         | Placebo |         | HCQ                                  |         | Placebo |         |
| n                                     | 414             |         | 407     |         | 208                             |         | 218     |         | 205                                  |         | 189     |         |
| Age                                   |                 | (I/S/%) |         | (I/S/%) |                                 | (I/S/%) |         | (I/S/%) |                                      | (I/S/%) |         | (I/S/%) |
| Median Age (IQR)                      | 41              | (33-51) | 40      | (32-50) | 40                              | (33-49) | 39      | (32-49) | 42                                   | (32-52) | 41      | (33-51) |
| Average age (SD)                      | 42.3            | (12.7)  | 41.8    | (12.0)  | 42.1                            | (12.3)  | 41.1    | (11.7)  | 42.6                                 | (13.2)  | 42.7    | (12.3)  |
| <b>Age distribution (%) of cohort</b> |                 |         |         |         |                                 |         |         |         |                                      |         |         |         |
| Age 18-35                             | 151             | (36%)   | 145     | (36%)   | 75                              | (36%)   | 84      | (39%)   | 76                                   | (37%)   | 61      | (32%)   |
| Age 35-50                             | 159             | (38%)   | 171     | (42%)   | 89                              | (43%)   | 93      | (43%)   | 69                                   | (34%)   | 78      | (41%)   |
| Age >50                               | 104             | (25%)   | 91      | (22%)   | 44                              | (21%)   | 41      | (19%)   | 60                                   | (29%)   | 50      | (26%)   |
| Median weight (kg)                    | 75              | (64-86) | 76      | (64-91) | 75                              | (64-89) | 77      | (64-93) | 75                                   | (63-84) | 74      | (62-86) |
| <b>Biologic Sex</b>                   |                 |         |         |         |                                 |         |         |         |                                      |         |         |         |
| Female                                | 218             | (52.7%) | 206     | (50.6%) | 102                             | (49.0%) | 106     | (48.6%) | 116                                  | (56.6%) | 100     | (52.9%) |
| Male                                  | 192             | (46.4%) | 197     | (48.4%) | 104                             | (50.0%) | 111     | (50.9%) | 87                                   | (42.4%) | 86      | (45.5%) |
| Not stated                            | 4               | (1.0%)  | 4       | (1.0%)  | 2                               | (1.0%)  | 1       | (0.5%)  | 2                                    | (1.0%)  | 3       | (1.6%)  |
| <b>Ethnicity (all that apply)</b>     |                 |         |         |         |                                 |         |         |         |                                      |         |         |         |
| White or Caucasian                    | 245             | (59.2%) | 262     | (64.4%) | 128                             | (61.5%) | 146     | (67.0%) | 117                                  | (57.1%) | 116     | (61.4%) |
| Black or African American             | 19              | (4.6%)  | 18      | (4.4%)  | 9                               | (4.3%)  | 11      | (5.0%)  | 10                                   | (4.9%)  | 7       | (3.7%)  |
| Asian                                 | 92              | (22.2%) | 83      | (20.4%) | 45                              | (21.6%) | 37      | (17.0%) | 47                                   | (22.9%) | 46      | (24.3%) |
| Native Hawaiian or Pacific Islander   | 2               | (0.5%)  | 2       | (0.5%)  | 2                               | (1.0%)  | 1       | (0.5%)  | 0                                    | (0.0%)  | 1       | (0.5%)  |
| Hispanic or Latino                    | 22              | (5.3%)  | 23      | (5.7%)  | 10                              | (4.8%)  | 11      | (5.0%)  | 12                                   | (5.9%)  | 12      | (6.3%)  |
| Native American or Alaska Native      | 2               | (0.5%)  | 1       | (0.2%)  | 1                               | (0.5%)  | 0       | (0.0%)  | 0                                    | (0.0%)  | 1       | (0.5%)  |
| Middle Eastern                        | 11              | (2.7%)  | 2       | (0.5%)  | 4                               | (1.9%)  | 1       | (0.5%)  | 7                                    | (3.4%)  | 1       | (0.5%)  |
| South Asian                           | 18              | (4.3%)  | 20      | (4.9%)  | 9                               | (4.3%)  | 12      | (5.5%)  | 9                                    | (4.4%)  | 8       | (4.2%)  |
| Other                                 | 6               | (1.4%)  | 3       | (0.7%)  | 2                               | (1.0%)  | 3       | (1.4%)  | 4                                    | (2.0%)  | 0       | (0.0%)  |
| <b>Current Smoker</b>                 |                 |         |         |         |                                 |         |         |         |                                      |         |         |         |
| Current Smoker                        | 15              | (3.6%)  | 12      | (2.9%)  | 6                               | (2.9%)  | 9       | (4.1%)  | 8                                    | (3.9%)  | 3       | (1.6%)  |
| Non-smoker                            | 395             | (95.4%) | 391     | (96.1%) | 200                             | (96.2%) | 208     | (95.4%) | 195                                  | (95.1%) | 183     | (96.8%) |
| Not stated                            | 4               | (1.0%)  | 4       | (1.0%)  | 2                               | (1.0%)  | 1       | (0.5%)  | 2                                    | (1.0%)  | 3       | (1.6%)  |
| <b>Country</b>                        |                 |         |         |         |                                 |         |         |         |                                      |         |         |         |

|                                                                                      |     |         |         |         |         |         |         |         |         |         |     |         |
|--------------------------------------------------------------------------------------|-----|---------|---------|---------|---------|---------|---------|---------|---------|---------|-----|---------|
| Canada                                                                               | 10  | (2.4%)  | 11      | (2.7%)  | 7       | (3.4%)  | 10      | (4.6%)  | 3       | (1.5%)  | 1   | (0.5%)  |
| United States                                                                        | 404 | (97.6%) | 396     | (97.3%) | 201     | (96.6%) | 208     | (95.4%) | 202     | (98.5%) | 188 | (99.5%) |
| <b>Regularly Taking Any of These Medications</b>                                     |     |         |         |         |         |         |         |         |         |         |     |         |
| Losartan                                                                             | 14  | (3.4%)  | 15      | (3.7%)  | 8       | (3.8%)  | 9       | (4.1%)  | 6       | (2.9%)  | 6   | (3.2%)  |
| Aspirin                                                                              | 10  | (2.4%)  | 13      | (3.2%)  | 4       | (1.9%)  | 10      | (4.6%)  | 6       | (2.9%)  | 3   | (1.6%)  |
| Ibuprofen/naproxen                                                                   | 8   | (1.9%)  | 8       | (2.0%)  | 1       | (0.5%)  | 4       | (1.8%)  | 7       | (3.4%)  | 4   | (2.1%)  |
| Tylenol                                                                              | 8   | (1.9%)  | 11      | (2.7%)  | 2       | (1.0%)  | 5       | (2.3%)  | 6       | (2.9%)  | 6   | (3.2%)  |
| No medications                                                                       | 290 | (70.0%) | 269     | (66.1%) | 133     | (63.9%) | 125     | (57.3%) | 156     | (76.1%) | 144 | (76.2%) |
| Taking zinc in study                                                                 | 100 | (24.2%) | 85      | (20.9%) | 47      | (22.6%) | 46      | (21.1%) | 53      | (25.9%) | 39  | (20.6%) |
| Taking Vitamin C in study                                                            | 140 | (33.8%) | 130     | (31.9%) | 68      | (32.7%) | 71      | (32.6%) | 71      | (34.6%) | 59  | (31.2%) |
| <b>Contact type</b>                                                                  |     |         |         |         |         |         |         |         |         |         |     |         |
| HCW                                                                                  | 275 | (66.4%) | 270     | (66.3%) | 147     | (70.7%) | 152     | (69.7%) | 128     | (62.4%) | 118 | (62.4%) |
| Household                                                                            | 125 | (30.2%) | 120     | (29.5%) | 54      | (26.0%) | 56      | (25.7%) | 71      | (34.6%) | 64  | (33.9%) |
| High-risk exposure                                                                   | 365 | (88.2%) | 354     | (87.0%) | 186     | (89.4%) | 180     | (82.6%) | 179     | (87.3%) | 174 | (92.1%) |
| No PPE worn                                                                          | 258 | (62.3%) | 237     | (58.2%) | 126     | (60.6%) | 116     | (53.2%) | 132     | (64.4%) | 121 | (64.0%) |
| <b>Days from exposure to receipt of study drug (Day 1 = exposure. As % of cohort</b> |     |         |         |         |         |         |         |         |         |         |     |         |
|                                                                                      | 1   | 0       | 0       | 0       | 0       | 0       | 0       | 0       | 0       | 0       | 0   | 0       |
|                                                                                      | 2   | 32      | (7.7%)  | 20      | (4.9%)  | 32      | (15.4%) | 20      | (9.2%)  |         |     |         |
|                                                                                      | 3   | 91      | (22.0%) | 92      | (22.6%) | 91      | (43.8%) | 92      | (42.2%) |         |     |         |
|                                                                                      | 4   | 85      | (20.6%) | 106     | (26.0%) | 85      | (40.9%) | 106     | (48.6%) |         |     |         |
|                                                                                      | 5   | 123     | (29.8%) | 119     | (29.2%) |         |         |         | 123     | (60.0%) | 119 | (63.0%) |
|                                                                                      | 6   | 62      | (15.0%) | 62      | (15.2%) |         |         |         | 62      | (30.2%) | 62  | (32.8%) |
|                                                                                      | 7   | 20      | (4.8%)  | 8       | (2.0%)  |         |         |         | 20      | (9.8%)  | 8   | (4.2%)  |
| <b>Coexisting conditions/ Chronic health conditions (all that apply)</b>             |     |         |         |         |         |         |         |         |         |         |     |         |
| None                                                                                 | 306 | (73.9%) | 290     | (71.3%) | 159     | (76.4%) | 156     | (71.6%) | 146     | (71.2%) | 134 | (70.9%) |
| High blood pressure                                                                  | 51  | (12.3%) | 48      | (11.8%) | 25      | (12.0%) | 28      | (12.8%) | 26      | (12.7%) | 20  | (10.6%) |
| Asthma                                                                               | 31  | (7.5%)  | 31      | (7.6%)  | 15      | (7.2%)  | 15      | (6.9%)  | 16      | (7.8%)  | 16  | (8.5%)  |
| Diabetes                                                                             | 12  | (2.9%)  | 16      | (3.9%)  | 6       | (2.9%)  | 7       | (3.2%)  | 6       | (2.9%)  | 9   | (4.8%)  |
| Cardiovascular disease                                                               | 4   | (1.0%)  | 2       | (0.5%)  | 4       | (1.9%)  | 1       | (0.5%)  | 0       | (0.0%)  | 1   | (0.5%)  |
| Cancer or malignancy                                                                 | 1   | (0.2%)  | 2       | (0.5%)  | 0       | (0.0%)  | 2       | (0.9%)  | 1       | (0.5%)  | 0   | (0.0%)  |
| Chronic kidney disease                                                               | 0   | (0.0%)  | 3       | (0.7%)  | 0       | (0.0%)  | 3       | (1.4%)  | 0       | (0.0%)  | 0   | (0.0%)  |
| Other chronic lung disease                                                           | 3   | (0.7%)  | 0       | (0.0%)  | 1       | (0.5%)  | 0       | (0.0%)  | 2       | (1.0%)  | 0   | (0.0%)  |
| Chronic liver disease                                                                | 0   | (0.0%)  | 0       | (0.0%)  | 0       | (0.0%)  | 0       | (0.0%)  | 0       | (0.0%)  | 0   | (0.0%)  |
| HIV                                                                                  | 1   | (0.2%)  | 0       | (0.0%)  | 1       | (0.5%)  | 0       | (0.0%)  | 0       | (0.0%)  | 0   | (0.0%)  |
| Transplant recipient                                                                 | 0   | (0.0%)  | 1       | (0.2%)  | 0       | (0.0%)  | 1       | (0.5%)  | 0       | (0.0%)  | 0   | (0.0%)  |

|                                                        |    |        |    |        |    |        |    |        |    |        |    |        |
|--------------------------------------------------------|----|--------|----|--------|----|--------|----|--------|----|--------|----|--------|
| Corticosteroids,<br>chemotherapy,<br>immunosuppressive | 2  | (0.5%) | 1  | (0.2%) | 0  | (0.0%) | 1  | (0.5%) | 2  | (1.0%) | 0  | (0.0%) |
| Hepatitis B or C                                       | 1  | (0.2%) | 0  | (0.0%) | 0  | (0.0%) | 0  | (0.0%) | 1  | (0.5%) | 0  | (0.0%) |
| Other                                                  | 25 | (6.0%) | 31 | (7.6%) | 13 | (6.3%) | 16 | (7.3%) | 12 | (5.9%) | 15 | (7.9%) |



Table S 2: Clarification of Exposure Risk Definition

The published account of the PEP<sup>26</sup> study defines the risk of exposure as household or occupational exposure to someone with confirmed Covid-19 at a distance of less than 6 ft for more than 10 minutes while:

- High-risk exposure: wearing neither a face mask nor an eye shield
- Moderate-risk exposure: wearing a face mask but no eye shield

The principal investigator (personal communication) informed us that due to changing CDC HCW risk guidance, the risk score changed over time (March 17, March 19, and April 3, 2020) and that there was more nuance than was captured in the database. There was also discussion with some of the participants regarding their risk definition (example – HCW who wore PPE but then removed it in the presence of the patient). From March 19 onward, the risk definition was:

| Contact Type | Risk type | Distance/Time     | PPE                 | Eye protection | Face protection |
|--------------|-----------|-------------------|---------------------|----------------|-----------------|
| Household    | High      | < 6ft + > 10 min  | None                |                |                 |
| Household    | Moderate  | < 6ft + > 10 min  | Any                 |                |                 |
| Household    | Low       | > 6ft or < 10 min |                     |                |                 |
| HCW          | High      | < 6ft + > 10 min  | “less than optimal” |                |                 |
| HCW          | High      | < 6ft + > 10 min  |                     | No             | No              |
| HCW          | High      | < 6ft + > 10 min  |                     | No             | Yes             |
| HCW          | High      | < 6ft + > 10 min  |                     | Yes            | No              |
| HCW          | Moderate  | < 6ft + > 10 min  | Full                |                |                 |
| HCW          | Moderate  | < 6ft + > 10 min  |                     | Yes            | Yes             |
| HCW          | Low       | > 6ft or < 10 min |                     |                |                 |

Table S 3: Distribution of days for drug receipt days within strata for study enrollment

| Enrollment day | Day of drug receipt |    |     |    |     |     |    | Total |
|----------------|---------------------|----|-----|----|-----|-----|----|-------|
|                | 1                   | 2  | 3   | 4  | 5   | 6   | 7  |       |
| 1              | 0                   | 52 | 70  | 18 | 0   | 0   | 0  | 140   |
| 2              | 0                   | 0  | 113 | 67 | 26  | 0   | 0  | 206   |
| 3              | 0                   | 0  | 0   | 98 | 94  | 23  | 0  | 215   |
| 4              | 0                   | 0  | 0   | 8  | 122 | 101 | 28 | 259   |

For each of the enrollment days described in the original report, the days on which drug receipt occurred are shown. Day 1 = day of exposure.

Note time-related data for one subject (#308) are missing. In the original, the 10/6 and the 10/30 datasets, data for subject #308 for the variables describing the time from exposure to enrollment or drug delivery were missing. Although data for time between enrollment and shipping (1.58 days) were provided in the 9/9 dataset for this subject, it was not possible to assign this subject to any time stratum. We have therefore retained the exclusion of this subject from the applicable analyses, as in the original work.

Table S 4: Stratification of effect associated with hydroxychloroquine by gender based on time from exposure to drug receipt (ITT population)

|                                                 | Hydroxychloroquine |         |       | Placebo |         |       | RR   | CI Low | CI Up |
|-------------------------------------------------|--------------------|---------|-------|---------|---------|-------|------|--------|-------|
|                                                 | n Pos              | N Total | %Pos  | n Pos   | N Total | %Pos  |      |        |       |
| <b>Early prophylaxis 1-3 days post exposure</b> |                    |         |       |         |         |       |      |        |       |
| <b>Male</b>                                     | 7                  | 104     | 6.7%  | 14      | 111     | 12.6% | 0.53 | 0.22   | 1.27  |
| <b>Female</b>                                   | 13                 | 102     | 12.7% | 21      | 106     | 19.8% | 0.64 | 0.34   | 1.22  |
| <b>Late prophylaxis 4-6 days post-exposure</b>  |                    |         |       |         |         |       |      |        |       |
| <b>Male</b>                                     | 12                 | 87      | 13.8  | 10      | 86      | 11.6% | 1.19 | 0.54   | 2.60  |
| <b>Female</b>                                   | 17                 | 116     | 14.7% | 12      | 100     | 12.0% | 1.22 | 0.61   | 2.43  |

The number (and percent) of subjects with a Covid-19 positive outcome are shown for each group along with the total number of subjects for that group, stratified by time from exposure to drug receipt. The elapsed time range in days is shown for Early and Late cohorts.

See note in Table S 3 regarding tallies for time-stratified data.

Table S 5: Stratification of effect associated with hydroxychloroquine by exposure risk type based on time from exposure to drug receipt (ITT population)

|                                                 | Hydroxychloroquine |         |       | Plac |         |       | RR   | CI Low | CI Up | NNT  | p     |
|-------------------------------------------------|--------------------|---------|-------|------|---------|-------|------|--------|-------|------|-------|
|                                                 | nPos               | N Total | %Pos  | nPos | N Total | %Pos  |      |        |       |      |       |
| <b>All times</b>                                |                    |         |       |      |         |       |      |        |       |      |       |
| High                                            | 43                 | 365     | 11.8% | 54   | 354     | 15.3% | 0.77 | 0.53   | 1.12  | 28.8 | 0.191 |
| Moderate                                        | 6                  | 48      | 12.5% | 4    | 53      | 7.5%  | 1.66 | 0.50   | 5.52  |      |       |
| <b>Early prophylaxis 1-3 days post exposure</b> |                    |         |       |      |         |       |      |        |       |      |       |
| High                                            | 16                 | 186     | 8.6%  | 32   | 180     | 17.8% | 0.48 | 0.28   | 0.85  | 10.9 | 0.013 |
| Moderate                                        | 4                  | 22      | 18.2% | 4    | 38      | 10.5% | 1.73 | 0.48   | 6.23  |      |       |
| <b>Late prophylaxis 4-6 days post-exposure</b>  |                    |         |       |      |         |       |      |        |       |      |       |
| High                                            | 27                 | 179     | 15.1% | 22   | 174     | 12.6% | 1.19 | 0.71   | 2.01  |      |       |
| Moderate                                        | 2                  | 26      | 7.7%  | 0    | 15      | 0.0%  |      |        |       |      |       |

The number (and percent) of subjects with a Covid-19 positive outcome are shown for each group along with the total number of subjects for that group, stratified by time from exposure to drug receipt. The elapsed time range in days is shown for Early and Late cohorts.

See note in Table S 3 regarding tallies for time-stratified data.

Table S 6: Summary of subjects forming “Responding Population”

|                                                   | <b>Total</b> | <b>HCQ</b> | <b>Placebo</b> |
|---------------------------------------------------|--------------|------------|----------------|
| Original ITT Cohort                               | 821          | 414        | 407            |
| <i>Excluded will be subjects:</i>                 |              |            |                |
| Withdrew Consent                                  | 8            | 4          | 4              |
| LTF, no survey data per Table S1 in PEP study     | 55           | 25         | 30             |
| LTF, noted as "Some Survey Data", but no symptoms | 9            | 5          | 4              |
| <b>Totals for exclusion</b>                       | <b>72</b>    | <b>34</b>  | <b>38</b>      |
| <b>Total included in Responding Population</b>    | <b>749</b>   | <b>380</b> | <b>369</b>     |

Of the 88 LTF patients, 52 were reported as not completing any surveys and were unresponsive to follow up. Another 36 had: some survey data with vital status after day 14 known (16), no survey with vital status after day 14 known (3) or no survey with vital status after day 14 unknown (17). We examined the 33 patients noted as having some survey data and found that there were 9 with no symptom data. There was a total of 72 patients with no symptom data at all which we excluded from the Responding Population. The remaining 24 patients had incomplete symptom data for days 3, 5, 10 and 14 in various combinations and we considered their outcomes as includable using the “last observation carried forward” (LOCF) method using the endpoint adjudication of the original authors.

Table S 7: Effect of adherence to study drug on development of Covid-19 within Responding Population (RP)

| Adherence                      | Hydroxychloroquine |         |       | Placebo |         |       | RR   | CI Low | CI Up |
|--------------------------------|--------------------|---------|-------|---------|---------|-------|------|--------|-------|
|                                | n Pos              | N Total | %     | n Pos   | N Total | %     |      |        |       |
| ITT Cohort, as published       | 49                 | 414     | 11.8% | 58      | 407     | 14.3% | 0.83 | 0.58   | 1.18  |
| All subjects (RP)              | 49                 | 380     | 12.9% | 58      | 369     | 15.7% | 0.82 | 0.58   | 1.17  |
| Fully adherent (RP)            | 43                 | 312     | 13.8% | 50      | 336     | 14.9% | 0.93 | 0.64   | 1.35  |
| Partially adherent (RP)        | 4                  | 36      | 11.1% | 3       | 12      | 25.0% | 0.44 | 0.12   | 1.71  |
| Not adherent (RP)              | 2                  | 32      | 6.3%  | 5       | 21      | 23.8% |      |        |       |
| Fully + Partial adherence (RP) | 47                 | 348     | 13.5% | 53      | 348     | 15.2% | 0.89 | 0.62   | 1.28  |

The number (and percent) of subjects with a Covid-19 positive outcome are shown for each group along with the total number of subjects for that group, stratified by adherence to study medication. The data from the ITT cohort from the original paper are shown for reference.

Table S 8: Effect associated with folate placebo in Responding Population

|                                           | Hydroxychloroquine |         |       | Placebo               |         |       | RR   | CI<br>Low | CI<br>Up |
|-------------------------------------------|--------------------|---------|-------|-----------------------|---------|-------|------|-----------|----------|
|                                           | n Pos              | N Total | %     | n Pos                 | N Total | %     |      |           |          |
| HCQ vs. Folate only placebo               | 47                 | 348     | 13.5% | 51                    | 337     | 15.1% | 0.89 | 0.62      | 1.29     |
| HCQ vs. no Folate control                 | 47                 | 348     | 13.5% | 9                     | 64      | 14.1% | 0.96 | 0.50      | 1.86     |
| HCQ vs. Combined control                  | 47                 | 348     | 13.5% | 60                    | 401     | 15.0% | 0.90 | 0.63      | 1.29     |
|                                           | <b>No folate</b>   |         |       | <b>Folate Placebo</b> |         |       |      |           |          |
| No Folate control vs. Folate only Placebo | 9                  | 64      | 14.1% | 51                    | 337     | 15.1% | 0.93 | 0.48      | 1.79     |

Shown is the percent (n/N) of subjects with Covid-19 positive outcome for the fully and partially adherent subgroups combined.

Table S 9: Effect associated with folate placebo in Responding Population (fully and partially adherent study subjects), stratified by time and gender.

|                                                 | n Pos | N Total | % Pos | RR   | 95% CI |       | p       |
|-------------------------------------------------|-------|---------|-------|------|--------|-------|---------|
|                                                 |       |         |       |      | Lower  | Upper |         |
| <b>Early prophylaxis 1-3 days post exposure</b> |       |         |       |      |        |       |         |
| <b>Male + Female</b>                            |       |         |       |      |        |       |         |
| HCQ                                             | 19    | 173     | 11.0% |      |        |       |         |
| Folate Placebo                                  | 31    | 183     | 16.9% | 0.65 | 0.38   | 1.10  | p=0.127 |
| No Folate                                       | 6     | 35      | 17.1% | 0.64 | 0.28   | 1.49  |         |
| Combined Control                                | 37    | 218     | 17.0% | 0.65 | 0.39   | 1.08  | p=0.11  |
| <b>MALE</b>                                     |       |         |       |      |        |       |         |
| HCQ                                             | 83    | 7       | 8.4%  |      |        |       |         |
| Folate Placebo                                  | 90    | 12      | 13.3% | 0.63 | 0.26   | 1.53  |         |
| No Folate                                       | 21    | 2       | 9.5%  | 0.89 | 0.20   | 3.96  |         |
| Combined Control                                | 111   | 14      | 12.6% | 0.67 | 0.28   | 1.58  |         |
| <b>FEMALE</b>                                   |       |         |       |      |        |       |         |
| HCQ                                             | 89    | 12      | 13.5% |      |        |       |         |
| Folate Placebo                                  | 92    | 18      | 19.6% | 0.69 | 0.35   | 1.35  |         |
| No Folate                                       | 14    | 4       | 28.6% | 0.47 | 0.18   | 1.26  |         |
| Combined Control                                | 106   | 22      | 20.8% | 0.65 | 0.34   | 1.24  |         |
| <b>Late prophylaxis 4-6 days post-exposure</b>  |       |         |       |      |        |       |         |
| <b>Male + Female</b>                            |       |         |       |      |        |       |         |
| HCQ                                             | 28    | 174     | 16.1% |      |        |       |         |
| Folate Placebo                                  | 20    | 154     | 13.0% | 1.24 | 0.73   | 2.11  |         |
| No Folate                                       | 3     | 29      | 10.3% | 1.56 | 0.51   | 4.79  |         |
| Combined Control                                | 23    | 183     | 12.6% | 1.28 | 0.77   | 2.13  |         |
| <b>MALE</b>                                     |       |         |       |      |        |       |         |
| HCQ                                             | 77    | 11      | 14.3% |      |        |       |         |
| Folate Placebo                                  | 73    | 9       | 12.3% | 1.16 | 0.51   | 2.63  |         |
| No Folate                                       | 12    | 2       | 16.7% | 0.86 | 0.22   | 3.40  |         |
| Combined Control                                | 85    | 11      | 12.9% | 1.10 | 0.51   | 2.40  |         |
| <b>FEMALE</b>                                   |       |         |       |      |        |       |         |
| HCQ                                             | 95    | 17      | 17.9% |      |        |       |         |
| Folate Placebo                                  | 79    | 11      | 13.9% | 1.29 | 0.64   | 2.58  |         |
| No Folate                                       | 17    | 1       | 5.9%  | 3.04 | 0.43   | 21.37 |         |
| Combined Control                                | 96    | 12      | 12.5% | 1.43 | 0.72   | 2.83  |         |

RR - Risk Ratios vs. HCQ shown

Shown is the percent (n/N) of subjects with Covid-19 positive outcome for the fully and partially adherent subgroups combined, stratified by control group type and gender.

See note in Table S 3 regarding tallies for time-stratified data.



Table S 10: Effect of ex-protocol use of Zinc or Vitamin C on effect associated with hydroxychloroquine stratified by time from exposure to drug receipt

Part A: Numbers of subjects reporting at two subject surveys to be taking zinc or Vitamin C.

| Zinc     | Vitamin C |         |          |      |       |
|----------|-----------|---------|----------|------|-------|
|          | None      | d5 only | d14 only | both | any   |
| None     | 504 *     | 24      | 49       | 59 * | 132 * |
| d5 only  | 6         | 8       | 0        | 6    | 14    |
| d14 only | 19        | 1       | 32       | 13   | 46    |
| both     | 22 *      | 4       | 4        | 70 * | 78 *  |
| any      | 47*       | 13      | 36       | 89 * | 138*  |

Subject surveys were carried out on days 5 and 14 numbering from day of receipt of study drug. The number of subjects reporting taking either agent at either or both days 5 and 14 are shown. Detail for use of either agent at these time points was provided at our request in the 9/9 revision. The combinations marked with an asterisk \* are subject to further analysis below, representing use of neither agent, both agents at both times either agent at any or both times time. Note that the total number of subjects reporting use of zinc is 185, which corrects a typographic error in the original paper.

Part B: Effect of ex-protocol use of zinc or vitamin C on effect associated with hydroxychloroquine stratified by time from exposure to drug receipt and by reported use of zinc or vitamin C.

The number (and percent) of subjects with a Covid-19 positive outcome are shown for each group along with the total number of subjects for that group, stratified by time from exposure to drug receipt (as Early to Late Prophylaxis cohorts).

| Zinc           | Vit C |       | HCQ   |         |       | Placebo |         |       | RR   | 95% CI |       |
|----------------|-------|-------|-------|---------|-------|---------|---------|-------|------|--------|-------|
|                |       |       | n Pos | N Total | %Pos  | n Pos   | N Total | %Pos  |      | CI Low | CI Up |
| ITT population |       | Early | 20    | 208     | 9.6%  | 36      | 218     | 16.5% | 0.58 | 0.35   | 0.97  |
| ITT population |       | Late  | 29    | 205     | 14.1% | 22      | 189     | 11.6% | 1.22 | 0.72   | 2.04  |
| None           | None  | Early | 9     | 128     | 7.0%  | 18      | 137     | 13.1% | 0.54 | 0.25   | 1.15  |
| None           | None  | Late  | 16    | 120     | 13.3% | 10      | 119     | 8.4%  | 1.59 | 0.75   | 3.35  |
| Both           | Both  | Early | 2     | 18      | 11.1% | 1       | 13      | 7.7%  | 1.44 | 0.15   | 14.29 |
| Both           | Both  | Late  | 3     | 19      | 15.8% | 2       | 20      | 10.0% | 1.58 | 0.30   | 8.43  |
| Both           | None  | Early | 1     | 6       | 16.7% | 1       | 3       | 33.3% | 0.50 | 0.05   | 5.51  |
| Both           | None  | Late  | 1     | 5       | 20.0% | 1       | 8       | 12.5% | 1.60 | 0.13   | 20.22 |
| None           | Both  | Early | 2     | 11      | 18.2% | 3       | 13      | 23.1% | 0.79 | 0.16   | 3.90  |
| None           | Both  | Late  | 0     | 15      | 0.0%  | 4       | 19      | 21.1% | 0.00 |        |       |
| None           | Any   | Early | 4     | 33      | 12.1% | 10      | 35      | 28.6% | 0.42 | 0.15   | 1.22  |
| None           | Any   | Late  | 5     | 32      | 15.6% | 7       | 31      | 22.6% | 0.69 | 0.25   | 1.95  |
| Any            | None  | Early | 1     | 12      | 8.3%  | 2       | 10      | 20.0% | 0.42 | 0.04   | 3.95  |
| Any            | None  | Late  | 3     | 14      | 21.4% | 1       | 11      | 9.1%  | 2.36 | 0.28   | 19.66 |
| Both           | Any   | Early | 3     | 20      | 15.0% | 1       | 15      | 6.7%  | 2.25 | 0.26   | 19.55 |
| Both           | Any   | Late  | 3     | 23      | 13.0% | 2       | 20      | 10.0% | 1.30 | 0.24   | 7.04  |
| Any            | Both  | Early | 2     | 19      | 10.5% | 2       | 17      | 11.8% | 0.89 | 0.14   | 5.68  |
| Any            | Both  | Late  | 4     | 27      | 14.8% | 4       | 26      | 15.4% | 0.96 | 0.27   | 3.45  |
| Any            | Any   | Early | 6     | 35      | 17.1% | 6       | 36      | 16.7% | 1.03 | 0.37   | 2.89  |
| Any            | Any   | Late  | 5     | 39      | 12.8% | 4       | 28      | 14.3% | 0.90 | 0.26   | 3.05  |

Table S 11: Effect of comorbidities on effect associated with HCQ

## Part A: Stratification by time only

|                                                 | nPos                      | N Total | %     | nPos           | N Total | %     | RR   | CI Low | CI Up | NNT  | p     |
|-------------------------------------------------|---------------------------|---------|-------|----------------|---------|-------|------|--------|-------|------|-------|
| <b>Whole Cohort</b>                             | <b>Hydroxychloroquine</b> |         |       | <b>Placebo</b> |         |       |      |        |       |      |       |
| All subjects                                    | 49                        | 414     | 11.8% | 58             | 407     | 14.3% | 0.83 | 0.58   | 1.18  | 41.4 | 0.351 |
| No co-morbidity                                 | 34                        | 306     | 11.1% | 46             | 290     | 15.9% | 0.70 | 0.46   | 1.06  | 21.0 | 0.094 |
| Hypertension                                    | 7                         | 51      | 13.7% | 5              | 48      | 10.4% | 1.32 | 0.45   | 3.87  |      |       |
| Asthma                                          | 5                         | 31      | 16.1% | 2              | 31      | 6.5%  | 2.50 | 0.52   | 11.93 |      |       |
| Diabetes                                        | 2                         | 12      | 16.7% | 2              | 16      | 12.5% | 1.33 | 0.22   | 8.16  |      |       |
| Other                                           | 4                         | 25      | 16.0% | 2              | 31      | 6.5%  | 2.48 | 0.49   | 12.45 |      |       |
| Excl. asthma or other                           | 40                        | 361     | 11.1% | 54             | 349     | 15.5% | 0.72 | 0.49   | 1.05  | 22.8 | 0.097 |
| Exclude asthma only                             | 44                        | 383     | 11.5% | 56             | 376     | 14.9% | 0.77 | 0.53   | 1.11  | 29.4 | 0.198 |
| <b>Early prophylaxis 1-3 days post exposure</b> |                           |         |       |                |         |       |      |        |       |      |       |
| All                                             | 20                        | 208     | 9.6%  | 36             | 218     | 16.5% | 0.58 | 0.35   | 0.97  | 14.5 | 0.044 |
| No co-morbidity                                 | 15                        | 159     | 9.4%  | 30             | 156     | 19.2% | 0.49 | 0.27   | 0.88  | 10.2 | 0.015 |
| Hypertension                                    | 2                         | 25      | 8.0%  | 2              | 28      | 7.1%  | 1.12 | 0.17   | 7.37  |      |       |
| Asthma                                          | 2                         | 15      | 13.3% | 1              | 15      | 6.7%  | 2.00 | 0.20   | 19.78 |      |       |
| Diabetes                                        | 1                         | 6       | 16.7% | 0              | 7       | 0.0%  |      |        |       |      |       |
| Other                                           | 1                         | 13      | 7.7%  | 1              | 16      | 6.3%  | 1.23 | 0.08   | 17.83 |      |       |
| Excl. asthma or other                           | 17                        | 181     | 9.4%  | 34             | 189     | 18.0% | 0.52 | 0.30   | 0.90  | 11.6 | 0.023 |
| Exclude asthma only                             | 18                        | 193     | 9.3%  | 35             | 203     | 17.2% | 0.54 | 0.32   | 0.92  | 12.6 | 0.026 |
| <b>Late prophylaxis 4-6 days post exposure</b>  |                           |         |       |                |         |       |      |        |       |      |       |
| All                                             | 29                        | 205     | 14.1% | 22             | 189     | 11.6% | 1.22 | 0.72   | 2.04  |      | 0.548 |
| No co-morbidity                                 | 19                        | 147     | 12.9% | 16             | 134     | 11.9% | 1.08 | 0.58   | 2.02  |      | 0.857 |
| Hypertension                                    | 5                         | 26      | 19.2% | 3              | 20      | 15.0% | 1.28 | 0.35   | 4.74  |      |       |
| Asthma                                          | 3                         | 16      | 18.8% | 1              | 16      | 6.3%  | 3.00 | 0.35   | 25.87 |      |       |
| Diabetes                                        | 1                         | 6       | 16.7% | 2              | 9       | 22.2% | 0.75 | 0.09   | 6.55  |      |       |
| Other                                           | 3                         | 12      | 25.0% | 1              | 15      | 6.7%  | 3.75 | 0.44   | 31.62 |      |       |
| Excl. asthma or other                           | 23                        | 180     | 12.8% | 20             | 160     | 12.5% | 1.02 | 0.58   | 1.79  |      | 1     |
| Exclude asthma only                             | 26                        | 190     | 13.7% | 21             | 173     | 12.1% | 1.13 | 0.66   | 1.93  |      | 0.755 |

Part B: Subjects reporting no comorbidities, stratified by age and time

|                                                 | nPos                      | N Total | %     | nPos           | N Total | %     | RR   | CI Low | CI Up | NNT  | p     |
|-------------------------------------------------|---------------------------|---------|-------|----------------|---------|-------|------|--------|-------|------|-------|
| <b>Whole Cohort</b>                             | <b>Hydroxychloroquine</b> |         |       | <b>Placebo</b> |         |       |      |        |       |      |       |
| All ages                                        | 34                        | 306     | 11.1% | 46             | 290     | 15.9% | 0.70 | 0.46   | 1.06  | 21.0 | 0.094 |
| 18-45                                           | 26                        | 188     | 12.1% | 38             | 167     | 18.5% | 0.65 | 0.41   | 1.04  | 15.7 | 0.078 |
| 45-90                                           | 8                         | 84      | 8.7%  | 8              | 77      | 9.4%  | 0.92 | 0.36   | 2.35  | 1    | 139.6 |
| <b>Early prophylaxis 1-3 days post exposure</b> |                           |         |       |                |         |       |      |        |       |      |       |
| All ages                                        | 15                        | 159     | 9.4%  | 30             | 156     | 19.2% | 0.49 | 0.27   | 0.88  | 10.2 | 0.015 |
| 18-45                                           | 11                        | 117     | 9.4%  | 24             | 112     | 21.4% | 0.44 | 0.23   | 0.85  | 8.3  | 0.016 |
| 45-90                                           | 4                         | 42      | 9.5%  | 6              | 44      | 13.6% | 0.70 | 0.21   | 2.30  | 24.3 | 0.739 |
| <b>Late prophylaxis 4-6 days post exposure</b>  |                           |         |       |                |         |       |      |        |       |      |       |
| All ages                                        | 19                        | 146     | 13.0% | 16             | 134     | 11.9% | 1.09 | 0.58   | 2.03  |      | 0.857 |
| 18-45                                           | 15                        | 96      | 15.6% | 14             | 93      | 15.1% | 1.04 | 0.53   | 2.03  |      | 1     |
| 45-90                                           | 4                         | 50      | 8.0%  | 2              | 41      | 4.9%  | 1.64 | 0.32   | 8.51  |      | 0.686 |

Shown is the percent (n/N) of subjects with Covid-19 positive outcome for subjects reporting the co-existing condition specified, stratified by time from exposure to drug receipt. The elapsed time range in days is shown for Early and Late cohorts.

See note in Table S 3 regarding tallies for time-stratified data.

## Supplemental References

1. Serseg T, Benarous K, Yousfi M. Hispidin and Lepidine E: two Natural Compounds and Folic acid as Potential Inhibitors of 2019-novel coronavirus Main Protease (2019-nCoV<sub>Mpro</sub>), molecular docking and SAR study. *Current computer-aided drug design* 2020 Apr 24. Epub Apr 24 <http://doi.org/10.2174/1573409916666200422075440>
2. Micholas S, Jeremy C. S. Repurposing Therapeutics for COVID-19: Supercomputer-Based Docking to the SARS-CoV-2 Viral Spike Protein and Viral Spike Protein-Human ACE2 Interface. *ChemRxiv* 2020; 2020:11871402. Epub Feb 27 <http://doi.org/10.26434/chemrxiv.11871402.v3>
3. Itelman E, Wasserstrum Y, Segev A, et al. Clinical Characterization of 162 COVID-19 patients in Israel: Preliminary Report from a Large Tertiary Center. *Isr Med Assoc J* 2020; 22:271-4. Epub May 8
4. Simanjuntak Y, Ko HY, Lee YL, Yu GY, Lin YL. Preventive effects of folic acid on Zika virus-associated poor pregnancy outcomes in immunocompromised mice. *PLoS Pathog* 2020; 16:e1008521. Epub May 12 <http://doi.org/10.1371/journal.ppat.1008521>
5. Yang J, Yang A, Wang Z, et al. Interactions between serum folate and human papillomavirus with cervical intraepithelial neoplasia risk in a Chinese population-based study. *Am J Clin Nutr* 2018; 108:1034-42. Epub Sep 25 <http://doi.org/10.1093/ajcn/nqy160>
6. Xiao S, Tang YS, Kusumanchi P, et al. Folate Deficiency Facilitates Genomic Integration of Human Papillomavirus Type 16 DNA In Vivo in a Novel Mouse Model for Rapid Oncogenic Transformation of Human Keratinocytes. *J Nutr* 2018; 148:389-400. Epub Mar 17 <http://doi.org/10.1093/jn/nxx060>
7. Fletcher H, Figueroa P, Brathwaite A, Hylton-Kong T. Poverty, folate deficiency, human immunodeficiency virus and ulcerated vulval sexually transmitted diseases in Jamaica. *The West Indian medical journal* 2011; 60:137-40. Epub Sep 29
8. Wiltshire E, Peña AS, MacKenzie K, Shaw G, Couper J. High dose folic acid is a potential treatment for pulmonary hypertension, including when associated with COVID-19 pneumonia. *Med Hypotheses* 2020; 143:110142. Epub Jul 26 <http://doi.org/10.1016/j.mehy.2020.110142>
9. Acosta-Elias J, Espinosa-Tanguma R. The Folate Concentration and/or Folic Acid Metabolites in Plasma as Factor for COVID-19 Infection. *Frontiers in pharmacology* 2020; 11:1062. Epub Aug 9 <http://doi.org/10.3389/fphar.2020.01062>
10. Müller C, Schibli R, Maurer B. Can Nuclear Imaging of Activated Macrophages with Folic Acid-Based Radiotracers Serve as a Prognostic Means to Identify COVID-19 Patients at Risk? *Pharmaceuticals (Basel, Switzerland)* 2020; 13. Epub Sep 13 <http://doi.org/10.3390/ph13090238>
11. Stegmann KM, Dickmanns A, Gerber S, et al. The folate antagonist methotrexate diminishes replication of the coronavirus SARS-CoV-2 and enhances the antiviral efficacy of remdesivir in cell culture models. *bioRxiv* 2020:2020.07.18.210013. Epub Jul 20 <http://doi.org/10.1101/2020.07.18.210013>
12. Caruso A, Caccuri F, Bugatti A, et al. Methotrexate inhibits SARS-CoV-2 virus replication "in vitro". *J Med Virol* 2020. Epub Sep 15 <http://doi.org/10.1002/jmv.26512>
13. Courtemanche C, Elson-Schwab I, Mashiyama ST, Kerry N, Ames BN. Folate deficiency inhibits the proliferation of primary human CD8+ T lymphocytes in vitro. *J Immunol* 2004; 173:3186-92. Epub Aug 24 <http://doi.org/10.4049/jimmunol.173.5.3186>
14. Misra DP, Gasparyan AY, Zimba O. Benefits and adverse effects of hydroxychloroquine, methotrexate and colchicine: searching for repurposable drug candidates. *Rheumatology international* 2020:1-11. Epub Sep 4 <http://doi.org/10.1007/s00296-020-04694-2>
15. Frohman EM, Villemarette-Pittman NR, Cruz RA, et al. Part II. high-dose methotrexate with leucovorin rescue for severe COVID-19: An immune stabilization strategy for SARS-CoV-2 induced 'PANIC' attack. *Journal of the neurological sciences* 2020; 415:116935. Epub May 21 <http://doi.org/10.1016/j.jns.2020.116935>
16. Frohman EM, Villemarette-Pittman NR, Melamed E, et al. Part I. SARS-CoV-2 triggered 'PANIC' attack in severe COVID-19. *Journal of the neurological sciences* 2020; 415:116936. Epub May 21 <http://doi.org/10.1016/j.jns.2020.116936>
17. Safavi F, Nath A. Silencing of immune activation with methotrexate in patients with COVID-19. *Journal of the neurological sciences* 2020; 415:116942. Epub May 31 <http://doi.org/10.1016/j.jns.2020.116942>

18. Vogel M, Tallo-Parra M, Herrera-Fernandez V, et al. Low zinc levels at clinical admission associates with poor outcomes in COVID-19. medRxiv 2020:2020.10.07.20208645. Epub Oct 11 <http://doi.org/10.1101/2020.10.07.20208645>
19. Yao JS, Paguio JA, Dee EC, et al. The minimal effect of zinc on the survival of hospitalized patients with Covid-19: an observational study. Chest 2020. Epub Jul 22 <http://doi.org/10.1016/j.chest.2020.06.082>
20. Xue J, Moyer A, Peng B, et al. Chloroquine is a zinc ionophore. PLoS One 2014; 9:e109180. Epub Oct 2 <http://doi.org/10.1371/journal.pone.0109180>
21. Holford PC, A.; Jovic, T.H.; Ali, S.R.; Whitaker, I.S.; Marik, P.; Smith, D. Vitamin C—An Adjunctive Therapy for Respiratory Infection, Sepsis and COVID-19. Preprints 2020:2020100407. Epub Oct 20 <http://doi.org/10.20944/preprints202010.0407.v1>
22. Marik PE, Kory P, Varon J, Iglesias J, Meduri GU. MATH+ protocol for the treatment of SARS-CoV-2 infection: the scientific rationale. Expert Rev Anti Infect Ther 2020:1-7. Epub Aug 19 <http://doi.org/10.1080/14787210.2020.1808462>
23. Hemila H, Chalker E. Vitamin C may reduce the duration of mechanical ventilation in critically ill patients: a meta-regression analysis. J Intensive Care 2020; 8:15. Epub Feb 13 <http://doi.org/10.1186/s40560-020-0432-y>
24. Wiseman DM, Kory P, Mazzucco D, Ramesh MS, Zervos M. Treatment and prevention of early disease before and after exposure to COVID-19 using hydroxychloroquine: A protocol for exploratory re-analysis of age and time-nuanced effects: Update based on initial dataset review. medRxiv 2020:2020.08.19.20178376. Epub Oct 9 <http://doi.org/10.1101/2020.08.19.20178376>
25. Luco J. Hydroxychloroquine as Post-Exposure Prophylaxis for Covid-19: Why simple data analysis can lead to the wrong conclusions from well-designed studies. ResearchGate 2020. Epub Sep <http://doi.org/10.13140/RG.2.2.24214.98880>
26. Boulware DR, Pullen MF, Bangdiwala AS, et al. A Randomized Trial of Hydroxychloroquine as Postexposure Prophylaxis for Covid-19. N Engl J Med 2020. Epub 2020 June 4 <http://doi.org/10.1056/NEJMoa2016638>
